# Supplementary material
Source: publisher figshare collection journal article supplement (https://gsajournals.figshare.com/ndownloader/files/37850994)
Supplement: Supplementary file 1 [file 37850994]

## Sheet: Greenhouse QTL
Population	Environment	Trait	Formula	QTL name	Chromosome	Most significantly associated marker	Marker position (cM)	LOD	R2	Parent with positive allele/increase in trait	Svevo rel. 1.0	Zavitan v2.0	CS RefSeq v2.1	Known genes within this region 10 Mb1	Known genes within this region 50 Mb1	Known genes within this region 100 Mb1	Putative gene orthologs to Rice2	Flanking left	Marker position (cM)	LOD	Flanking right	Marker position (cM)	LOD
DP527	Greenhouse	DTH2018	y ~ Q1 + Q2 + Q3 + Q4 + Q5 + Q6 + Q1:Q2	QEet.fcu-4A	4A	IWB26513	50.2818	9.0547	10.5431	PI 272527	59770222	61033975	60342340					IWB46982	46.0849	7.37109	IWB75383	53.2556	8.40569
DP527	Greenhouse	DTH2018		QEet.fcu-4B	4B	IWB67166	79.0105	6.24321	7.05013	Divide	530479603	undetermined	526115616					IWB36397	76.3782	4.19396	IWB51855	86.1956	4.36883
DP527	Greenhouse	DTH2018		QEet.fcu-5A	5A	fcp650(Q)	178.527	6.26305	7.07405	Divide	608794178	654782135	651815837	Q-5A	Q-5A	Q-5A		Xfcp650(Q)	178.527	6.26305	IWB58284	190.922	4.05115
DP527	Greenhouse	DTH2018		QEet.fcu-5B	5B	IWB29025	42.2599	5.07635	5.66052	Divide	undetermined	288600121	278112384					IWB76684	37.8472	2.41123	IWB5882	79.6211	2.43866
DP527	Greenhouse	DTH2018		QEet.fcu-5Bb	5B	IWB54773	93.8863	4.63152	5.13976	PI 272527	516986307	532396371	522298778			Vrn1-B1		IWB9615	90.582	2.84306	IWB33507	99.4191	2.55636
DP527	Greenhouse	DTH2018		QEet.fcu-7B	7B	IWB3164	10.5662	20.6522	27.3721	PI 272527	9380263	17076370	10546652	FT-1-7B	FT-1-7B	FT-1-7B, TaSus1-7B		IWB70086	4.87176	19.1466	IWB11170	12.4902	19.6627
DP527	Greenhouse	DTH2018			4A:4B			2.94623	3.21081
DP527	Greenhouse	DTH2019	y ~ Q1 + Q2 + Q3	QEet.fcu-1A	1A	IWB34353	160.606	11.4092	16.547	PI 272527	581313066	605188854	594439406	ELF3-a1	ELF3-a1	ELF3-a1		IWB45182	159.667	9.58311	IWB71745	163.679	10.2627
DP527	Greenhouse	DTH2019		QEet.fcu-4A	4B	IWB78285	81.1353	3.87828	5.17953	Divide	538730796	undetermined	534204603					IWB71830	28.0213	1.28145	IWB77484	94.6403	1.3807
DP527	Greenhouse	DTH2019		QEet.fcu-7B	7B	IWB11170	12.4902	15.2469	23.0809	PI 272527	11055823	18761278	12831094	FT-1-7B	FT-1-7B	FT-1-7B, TaSus1-7B		IWB70086	4.87176	13.7873	IWB11170	12.4902	15.2469
DP527	Greenhouse	PHT	y ~ Q1 + Q2 + Q3 +Q4 +Q5+Q6	QHt.fcu-2B	2B	IWB6117	53.1869	7.2709	6.90018	Divide	52362179	63140310	59775671	Ppd-B1	Ppd-B1	Ppd-B1, TaTGW-2B		IWB77048	44.8255	6.28355	IWB54881	56.491	6.22122
DP527	Greenhouse	PHT		QHt.fcu-3Aa	3A	IWB65564	89.3418	20.249	22.2018	PI 272527	524782328	532820246	533581557					IWB2704	88.882	19.8909	IWB78859	94.7194	19.1088
DP527	Greenhouse	PHT		QHt.fcu-3Ab	3A	IWB16621	150.086	6.68782	6.30672	PI 272527	681675490	691401559	691131202		TaTGW6-A1	TaTGW6-A1		IWB11684	140.992	5.10768	IWB80006	155.78	5.05069
DP527	Greenhouse	PHT		QHt.fcu-4A	4A	IWB76101	68.4163	4.66663	4.30548	Divide	563579589	569402354	569951942		TaSnRK2.10, TaCWI-4A, Rht-a1	TaSnRK2.10, TaCWI-4A, Rht-a1		IWB46982	46.0849	2.8525	IWB29546	74.417	2.7994
DP527	Greenhouse	PHT		QHt.fcu-5Ab	5A	IWB22035	93.1139	4.92062	4.55226	PI 272527	465236483	451125906	502824187			Vrn1-A1		IWB35587	63.2609	2.70797	IWB60157	99.2487	2.79707
DP527	Greenhouse	PHT		QHt.fcu-5A	5A	Xfcp650(Q)	178.527	22.5309	25.3555	PI 272527	608794178	654782135	651815837	Q-5A	Q-5A	Q-5A		Xfcp650(Q)	178.527	22.5309	Xfcp650(Q)	178.527	22.5309
DP527	Greenhouse	SPS	y ~ Q1 + Q2 + Q3 + Q4 + Q5 + Q6	QSpn.fcu-3B	3B	IWB3229	82.3273	5.97998	7.53226	PI 272527	undetermined	undetermined	undetermined					IWB38228	70.227	3.90083	IWB8299	89.3435	4.20377
DP527	Greenhouse	SPS		QSpn.fcu-4B	4B	IWB7389	93	3.61399	4.43736	PI 272527	641146848	undetermined	635843942				OsNRT1.1B	IWB12150	45.0441	0.796038	IWB77162	112.707	0.924621
DP527	Greenhouse	SPS		QSpn.fcu-5A	5A	IWB72022	58.3318	4.88823	6.08485	PI 272527	undetermined	360566498	414901648					IWB68312	41.9169	2.37367	IWB75736	153.93	2.31574
DP527	Greenhouse	SPS		QSpn.fcu-5B	5B	IWB76684	37.8472	4.70618	5.84673	PI 272527	59230249	66073499	60223484		TaSnRK2.9-5B	TaSnRK2.9-5B		IWB47775	28.1111	3.049	IWB79407	38.7731	3.25078
DP527	Greenhouse	SPS		QSpn.fcu-6A	6A	IWB73438	60.6208	3.98088	4.90716	Divide	451603539	466877975	457055147	TaTPP-6A	TaTPP-6A, GRF4-6A	TaTPP-6A, GRF4-6A, TaGS1a	OsMKKK10	IWB2480	56.5529	1.64089	IWB35245	114.032	1.23319
DP527	Greenhouse	SPS		QSpn.fcu-7B	7B	IWB3164	10.5662	14.2045	19.5841	PI 272527	9380263	17076370	10546652	FT-1-7B	FT-1-7B	FT-1-7B, TaSus1-7B		IWB3164	10.5662	14.2045	IWB11170	12.4902	13.0939
DP527	Greenhouse	KPS	y ~ Q1 + Q2 + Q3 + Q4 + Q5 + Q6 + Q7 + Q8 + Q9 + Q10 + Q11 + Q12 + Q7:Q8 + Q3:Q11 + Q7:Q10	QKps.fcu-1B	1B	IWB80190	108.418	4.42619	3.95679	Divide	621538032	648986314	633766803			ELF3-b1	OsPUP7	IWB13774	66.8985	1.55368	IWB6989	110.049	2.79841
DP527	Greenhouse	KPS		QKps.fcu-1Bb	1B	IWB74753	117.341	6.78107	6.2184	Divide	632420438	659133547	644851980				OsPUP7	IWB74753	117.341	6.78107	IWB12979	125.415	5.55229
DP527	Greenhouse	KPS		QKps.fcu-2B	2B	IWB78085	98.9148	15.7729	14.9646	Divide	370091207	382351335	385741820	FUL2	FUL2	SBEIIb, FUL2		IWB12642	96.7646	14.0851	IWB79530	100.081	15.5171
DP527	Greenhouse	KPS		QKps.fcu-3B	3B	IWB3779	145.396	4.6088	4.12815	PI 272527	undetermined	819078552	805984225					IWB1663	119.925	2.06929	IWB33965	160.899	2.38321
DP527	Greenhouse	KPS		QKps.fcu-5A	5A	Xfcp650(Q)	178.527	13.5933	13.4347	PI 272527	608794178	654782135	651815837	Q-5A	Q-5A	Q-5A		Xfcp650(Q)	178.527	13.5933	Xfcp650(Q)	178.527	13.5933
DP527	Greenhouse	KPS		QKps.fcu-5B	5B	IWB13019	127.736	5.7267	5.1918	PI 272527	588759488	608509651	595298646		Vrn1-B1	Vrn1-B1, Q-5B		IWB76684	37.8472	3.60641	IWB73788	129.851	3.24086
DP527	Greenhouse	KPS		QKps.fcu-6A	6A	IWB16446	6.92159	23.787	26.3825	PI 272527	12423060	undetermined	undetermined					IWB16446	6.92159	23.787	IWB16446	6.92159	23.787
DP527	Greenhouse	KPS		QKps.fcu-6Ab	6A	IWB44292	7.15968	22.2892	24.3	PI 272527	12356983	14991111	15831417					IWB44292	7.15968	22.2892	IWB44292	7.15968	22.2892
DP527	Greenhouse	KPS		QKps.fcu-6B	6B	IWB78052	85.568	7.17381	6.6067	Divide	577871473	603165980	609765161			GRF4-6B		IWB75900	76.6873	4.72937	IWB7171	94.5646	4.96134
DP527	Greenhouse	KPS		QKps.fcu-7A	7A	IWB65289	44.6155	7.95491	7.38866	Divide	undetermined	undetermined	52675005					IWB65289	44.6155	7.95491	IWB73571	46.5142	6.27804
DP527	Greenhouse	KPS		QKps.fcu-7B	7B	IWB3949	89.7226	10.6183	10.1546	Divide	566525959	594525507	586128396		TaSAP1-B1	TaSAP1-B1, TaSPL20	OsPTR9	IWB76683	86.1993	9.66391	IWB68838	91.9084	9.96158
DP527	Greenhouse	KPS		QKps.fcu-7Bb	7B	IWB69178	110.294	12.1495	11.817	PI 272527	613138154	645922644	634881379		TaSPL20	TaSAP1-B1, TaSPL20		IWB11631	110.062	11.7769	IWB57705	110.532	9.83483
DP527	Greenhouse	KPS			2B:7B1			5.12174	4.61306
DP527	Greenhouse	KPS			6A1:7A			7.43011	6.86185
DP527	Greenhouse	GWS2018	y ~ Q1 + Q2 + Q3	QGws.fcu-4A	4A	IWB26513	50.2818	4.87372	8.30581	Divide	59770222	61033975	60342340				OsMADS1	IWB40358	35.9486	2.38664	IWB29546	74.417	2.47793
DP527	Greenhouse	GWS2018		QGws.fcu-5A	5A	Xfcp650(Q)	178.527	4.83741	8.2407	PI 272527	608794178	654782135	651815837	Q-5A	Q-5A	Q-5A		fcp650(Q)	178.527	4.83741	IWB65730	183.716	3.61782
DP527	Greenhouse	GWS2018		QGws.fcu-5B	5B	IWB29025	42.2599	5.36737	9.19601	PI 272527	undetermined	288600121	278112384					IWB76684	37.8472	3.78901	IWB12463	48.3684	3.4805
DP527	Greenhouse	GWS2019	y ~ Q1	QGws.fcu-5B	5B	IWB77171	29.0348	3.33432	6.86204	PI 272527	43383543	46104273	44052464		TaSnRK2.9-5B	TaSnRK2.9-5B	OsPID, OsARF25	IWB75279	0.946809	0.782574	IWB49401	163.64	0.83052
DP527	Greenhouse	TKW	y ~ Q1 + Q2	QTkw.fcu-4A	4A	IWB26513	50.2818	4.82964	9.08976	Divide	59770222	61033975	60342340				OsMADS1	IWB21402	28.5093	2.43266	IWB77377	64.3826	2.49668
DP527	Greenhouse	TKW		QTkw.fcu-7B	7B	IWB11170	12.4902	3.915	7.29608	Divide	11055823	18761278	12831094	FT-1-7B	FT-1-7B	FT-1-7B, TaSus1-7B		IWB1438	0	1.86988	IWB6883	25.0097	1.43875
DP527	Greenhouse	KA	y ~ Q1 + Q2 + Q3	QKa.fcu-2B	2B	IWB2317	43.657	5.91817	9.60861	PI 272527	33368429	37212184	38339724				OsARG	IWB46375	41.2597	4.6777	IWB6117	53.1869	3.64374
DP527	Greenhouse	KA		QKa.fcu-4A	4A	IWB26513	50.2818	6.37082	10.3944	Divide	59770222	61033975	60342340				OsMADS1	IWB46982	46.0849	5.48436	IWB77377	64.3826	4.14803
DP527	Greenhouse	KA		QKa.fcu-6A	6A	IWB8079	68.7473	5.22613	8.42173	PI 272527	517359950	533726282	522683976	TaGS1a	TaGS1a, GRF4-6A	TaGS1a, GRF4-6A, TaTPP-6A		IWB81565	66.5508	5.17407	IWB78260	75.6327	3.48097
DP527	Greenhouse	KW	Null QTL model
DP527	Greenhouse	KL	y ~ Q1 + Q2 + Q3 + Q4 + Q5 + Q6 + Q7 + Q8 + Q9	QKl.fcu-1B	1B	IWB27824	29.8545	5.02333	4.36636	PI 272527	53421524	71869251	64192635				OsGSN1	IWB10650	22.5334	2.84341	IWB8875	37.7345	3.26549
DP527	Greenhouse	KL		QKl.fcu-2Ab	2A	IWB22924	80.6569	12.6055	11.9046	Divide	502649366	512957487	512533277	TaCwi-A1, SBEIIa	TaCwi-A1, SBEIIa	TaCwi-A1, SBEIIa, FUL2	OsGIF1	IWB71534	79.2723	10.9288	IWB62849	83.8164	12.0597
DP527	Greenhouse	KL		QKl.fcu-2A	2A	IWB72154	110.718	10.8614	10.0617	PI 272527	658462905	667431244	667284374		GNI1-A1-2A	GNI1-A1-2A, TaFlo2	OsMKKK10	IWB35671	102.538	9.46436	IWB72154	110.718	10.8614
DP527	Greenhouse	KL		QKl.fcu-2B	2B	IWB2317	43.657	12.4669	11.7557	PI 272527	33368429	37212184	38339724		Ppd-B1	Ppd-B1	OsARG	IWB2317	43.657	12.4669	IWB8355	45.7558	10.5739
DP527	Greenhouse	KL		QKl.fcu-3A	3A	IWB74967	87.4732	4.99169	4.33737	PI 272527	517062873	525078124	525796307				OsGL2	IWB38468	80.2318	3.38021	IWB25350	100.559	3.18849
DP527	Greenhouse	KL		QKl.fcu-3Ab	3A	IWB366	172.858	6.25456	5.50949	PI 272527	714403944	726376790	718576363			TaTGW6-B1	OsGNS4	IWB7482	165.315	4.50239	IWB30429	176.951	5.41436
DP527	Greenhouse	KL		QKl.fcu-4A	4A	IWB26513	50.2818	9.64085	8.81198	Divide	59770222	61033975	60342340				OsMADS1	IWB46982	46.0849	8.29002	IWB59437	54.173	8.13678
DP527	Greenhouse	KL		QKl.fcu-6A	6A	IWB7281	72.5582	7.5055	6.70192	PI 272527	529249256	545958924	537459870	TaGS1a	TaGS1a, GRF4-6A	TaGS1a, GRF4-6A, TaTPP-6A		IWB8079	68.7473	6.26959	IWB45422	75.4033	6.04224
DP527	Greenhouse	KL		QKl.fcu-7A	7A	IWB7435	145.943	4.34865	3.75251	Divide	664362643	679980803	675813224	WAPO1	WAPO1, TaSPL20	WAPO1, TaSAP1-A1, TaSPL20		IWB8476	61.7992	1.11532	IWB20419	175.004	1.12682
DP527	Greenhouse	KC	y ~ Q1 + Q2 + Q3 + Q4 + Q5 + Q6 + Q7 + Q2:Q6	QKc.fcu-1B	1B	IWB7813	31.9498	10.2031	10.5513	PI 272527	85469345	125197088	96916996					IWB9441	21.8422	8.33573	IWB8875	37.7345	9.28911
DP527	Greenhouse	KC		QKc.fcu-2A	2A	IWB62849	83.8164	16.6287	18.469	Divide	547989427	557917667	558542687		SBEIIa, TaCwi-A1	SBEIIa,TaCwi-A1, GNI1-A1-2A	OsD11	IWB62849	83.8164	16.6287	IWB57539	84.0468	14.901
DP527	Greenhouse	KC		QKc.fcu-2Ab	2A	IWB72154	110.718	11.8252	12.4494	PI 272527	658462905	667431244	667284374		GNI1-A1-2A	GNI1-A1-2A, TaFlo2	OsMKKK10	IWB72154	110.718	11.8252	IWB47525	124.276	10.0867
DP527	Greenhouse	KC		QKc.fcu-2B	2B	IWB8355	45.7558	7.16513	7.16747	PI 272527	42118584	50615757	49658167		Ppd-B1	Ppd-B1		IWB2317	43.657	5.44526	IWB43273	55.0835	5.41494
DP527	Greenhouse	KC		QKc.fcu-2Bb	2B	IWB7605	187.998	7.15517	7.15673	Divide	780906526	815101219	803255927			TaFlo2		IWB32246	173.51	5.19529	IWB7605	187.998	7.15517
DP527	Greenhouse	KC		QKc.fcu-5A	5A	IWB55023	6.58208	6.77601	6.74961	Divide	4115	undetermined	3799283			TaSnRK2.9-5A		IWB4290	0	5.82801	IWB10210	7.28305	4.83698
DP527	Greenhouse	KC		QKc.fcu-5B	5B	IWB61149	40.41	3.55808	3.4231	Divide	undetermined	115559710	107589255					IWB62348	26.7088	0.5198	IWB81171	192.161	0.255019
DP527	Greenhouse	KC			2A1:5A			4.11548	3.98317
DP527	Greenhouse	KLW	y ~ Q1 + Q2 + Q3 + Q4 + Q5	QKlw.fcu-1B	1B	IWB60559	30.5522	10.4716	13.1996	PI 272527	56671601	96899953	67468759				OsGSN1	IWB21571	24.9291	9.21681	IWB8875	37.7345	8.82237
DP527	Greenhouse	KLW		QKlw.fcu-2A	2A	IWB62849	83.8164	13.7884	18.0303	Divide	547989427	557917667	558542687		SBEIIa, TaCwi-A1	SBEIIa,TaCwi-A1, GNI1-A1-2A	OsD11	IWB62849	83.8164	13.7884	IWB60296	86.1909	12.5431
DP527	Greenhouse	KLW		QKlw.fcu-2Ab	2A	IWB72154	110.718	7.38065	8.99396	PI 272527	658462905	667431244	667284374		GNI1-A1-2A	GNI1-A1-2A, TaFlo2	OsMKKK10	IWB35671	102.538	5.61862	IWB47525	124.276	6.14746
DP527	Greenhouse	KLW		QKlw.fcu-2B	2B	IWB8355	45.7558	7.24265	8.81254	PI 272527	42118584	50615757	49658167		Ppd-B1	Ppd-B1		IWB2317	43.657	6.36193	IWB6117	53.1869	5.64354
DP527	Greenhouse	KLW		QKlw.fcu-2Bb	2B	IWB63568	184.624	3.75068	4.3945	Divide	782519272	824679121	811040676			TaFlo2		IWB71	165.932	1.44872	IWB7605	187.998	3.31214
References for putative wheat genes underlying QTL1
Alvarez MA, Tranquilli G, Lewis S, Kippes N, Dubcovsky J. 2016. Genetic and physical mapping of the erliness per se locus Eps-Am 1 in Triticum monococcum identifies EARLY FLOWERING 3 (ELF3) as a candidate gene. Funct Integr Genomics. 16:365-82.
Avni R, Oren L, Shabtay G, Assili S, Pozniak C, et al. 2018. Genome based meta-QTL analysis of grain weight in tatraploid wheat identifies rare alleles of GRF4 associated with larger grains. Genes. 9:636.
Boden SA, Cavanagh C, Cullis BR, Ramm K, Greenwood J, et al. 2015. Ppd-1 is a key regulator of inflorescence architecture and paired spikelet development in wheat. Nat Plants. 1:14016.
Chang J, Zhang J, Mao X, Li A, Jia J, et al. 2013. Polymorphism of TaSAP1-A1 and its association with agronomic traits in wheat. Planta. 237:1495-1508.
Distelfeld A, Tranquilli G, Li C, Yan L, Dubcovsky J. 2009. Genetic and molecular characterization of the VRN2 loci in tetraploid wheat. Plant Physiol. 149:245-257.
Golan G, Ayalon I, Perry A, Zimran G, Ade-Ajayi T, et al. 2019. GNI-A1 mediated trade-offs between grain number and grain weight in tetraploid wheat. Theor Appl Genet. 132:2353-2365.
Guo Y, Sun J, Zhang G, Wang Y, Kong F, et al. 2013. Haplotype, molecular marker and phenotype effects associated with mineral nutrient and grain size traits of TaGS1a in wheat. Field Crop Res. 154:119-125.
Hanif M, Gao F, Liu J, Wen W, Zhang Y, et al. 2016. TaTGW6-A1, an ortholog of rice TGW6, is associated with grain weight and yield in bread wheat. Mol Breeding. 36:1.
Hazard B, Zhang X, Colasuonno P, Uauy C, Beckles DM, et al. Induced mutations in the starch branching enzyme II (SBEII) genes increase amylose and resistance starch content in durum wheat. Crop Sci. 52:1754-1766.
Hou J, Jiang Q, Hao C, Wang Y, Zhang H, et al. 2014. Global selection on sucrose synthase haplotypes during a century of wheat breeding. Plant Physiol. 164:1918-1929.
Hu MJ, Zhang HP, Liu K, Cao JJ, Wang SX, et al. 2016. Cloning and characterization of TaTGW-7A gene associated with grain weight in wheat via SLAF-seq-BSA. Front Plant Sci. https://doi.org/10.3389/fpls.2016.01902.
Jiang Y, Jiang Q, Hao C, Hou J, Wang L, et al. 2015. A yield-associated gene TaCWI, in wheat: its function, selection and evolution in global breeding revealed by haplotype analysis. Theor Appl Genet. 128:131-143.
Kuzay S, Xu Y, Zhang J, Katz A, Pearce S, et al. 2019. Identification of a candidate gene for a QTL for spikelet number per spike on wheat chromosome arm 7AL by high-resolution genetic mapping. Theor Appl Genet. 132:2689-2705.
Li C, Lin H, Chen A, Lau M, Jernstedt J, et al. 2019. Wheat VRN1, FUL2 and FUL3 play critical and redundant roles in spikelet development and spike determinacy. Development. 146:dev175398.
Muqaddasi QH, Brassac J, Koppolu R, Plieske J, Ganal MW, et al. 2019. TaAPO-A1, an ortholog of rice ABERRANT PANICLE ORGANIZATION 1, is associated with total spikelet number per spike in elite European hexaploid winter wheat (Triticum aestivum L.) varieties. Sci Report. 9:13853.
Pearce S, Saville R, Vaughan SP, Chandler PM, Wilhelm EP, et al. 2011. Molecular characterization of Rht-1 dwarfing genes in hexaploid wheat. Plant Physiol. 157:1820-1831.
Rehman SU, Wang J, Chang X, Zhang X, Mao X, et al. 2019. A wheat protein kinase gene TaSnRK2.9-5A associated with yield contributing traits. Theor Appl Genet. 132:907-919.
Sajjad M, MaX, Khan SH, Shoaib M, Song Y, et al. 2017. TaFlo2-A1, an ortholog of rice Flo2, is associated with thousand grain weight in bread wheat (Triticum aestivum L.). BMC Plant Biol. 17:164.
Simons KJ, Fellers JP, Trick HN, Zhang Z, Tai YS, et al. 2006. Molecular characterization of the major wheat domestication gene Q. Genetics. 172:547-555.
Voss-Fels KP, Keeble-Gagnere G, Hickey LT, Tibbits J, Nagornyy S, et al. 2019. High-resolution mapping of rachis nodes per rachis, a critical determinant of grain yield components in wheat. Theor Appl Genet. 132:2707-2719.
Yan L, Fu D, Li C, Blechl A, Tranquilli G, et al. 2006. The wheat and barley vernalization gene VRN3 is an orthologue of FT. Proc Natl Acad Sci. 103:19581-19586.
Yan L, Helguera M, Kato K, Fukuyama S, Sherman J, et al. 2004. Allelic variation at the VRN-1 promoter region in polyploid wheat. Theor Appl Genet. 109:1677-1686.
Yan L, Loukoianov A, Blechl A, Tranquilli G, Ramakrishna W, et al. 2004. The wheat VRN2 gene is a flowering repressor downregulated by vernalization. Science. 303:1640-1644.
Yan L, Loukoianov A, Tranquilli G, Helguera M, Fahima T, et al. 2003. Positional cloning of the wheat vernalization gene VRN1. Proc Natl Acad Sci. 100:6263-6268.
Zhang B, Xu W, Liu X, Mao X, Li A, et al. 2017. Functional conservation and divergence among homoeologs of TaSPL20 and TaSPL21, two SBP-box genes governing yield-related traits in hexaploid wheat. Plant Physiol. 174:1177-1191.
Zhang ZG, Lv G, Li B, Wang JJ, Zhao Y, et al. 2017. Isolation and characterization of the TaSnRK2.10 gene and its association with agronomic traits in wheat (Triticum aestivum L.). PloS one. https://doi.org/10.1371/journal.pone.0174425.
Zhang P, He Z, Tian X, Gao F, Xu D, et al. 2017. Cloning of TaTPP-6AL1 associated with grain weight in bread wheat and development of functional marker. Mol Breeding. 37:78.
References for putative gene orthologs in Rice2
Fang ZM, Xia KF, Yang X, Suter M, Meier S, et al. 2014. Altered expression of the PTR/NRT1 homologue OsPTR9 affects nitrogen utilization efficiency, growth and grain yield in rice. Plant Biotechnol J. 11:446-458.
Guo T, Chen K, Dong NQ, Shi CL, Ye WW, et al. 2018. GRAIN SIZE AND NUMBER1 Negatively Regulates the OsMKKK10-OsMKK4-OsMPK6 Cascade to Coordinate the Trade-off between Grain Number per Panicle and Grain Size in Rice. The Plant Cell. 30:871-890.
He YB, Yan L, Ge CN, Yao XF, Han X, et al. 2019. PINOID is required for formation of the stigma and style in rice. Plant Physiol. 180:926-936.
Heang D, Sassa H. 2012. Antagonistic Actions of HLH/bHLH Proteins Are Involved in Grain Length and Weight in Rice. PLoS ONE. 7: e31325.
Hu B, Jing ZM, Wang W, Qiu YH, Zhang ZH, et al. 2019. Nitrate–NRT1.1B–SPX4 cascade integrates nitrogen and phosphorus signalling networks in plants. Nature Plants. 5:401-413.
Liu Q, Han RX, Wu K, Zhang JQ, Ye YF, et al. 2018. G-protein βγ subunits determine grain size through interaction with MADS-domain transcription factors in rice. Nature Communications. 9:852.
Lu YZ, Meng YL, Zeng J, Luo Y, Feng Z, et al. 2020. Coordination between GROWTH-REGULATING FACTOR1 and GRF-INTERACTING FACTOR1 plays a key role in regulating leaf growth in rice. BMC Plant Biol. 20:200.
Ma XF, Cheng ZJ, Qin RZ, Qiu Y, Heng YQ, et al. 2013. OsARG encodes an arginase that plays critical roles in panicle development and grain production in rice. Plant J. 73:190-200.
Qi P, Lin YS, Song XJ, Shen JB, Huang W, et al. 2012. The novel quantitative trait locus GL3.1 controls rice grain size and yield by regulating Cyclin-T1;3. Cell Research. 22:1666-1680.
Qi ZY, Xiong LZ. 2013. Characterization of a Purine Permease Family Gene OsPUP7 Involved in Growth and Development Control in Rice. J Integr Plant Biol. 55:1119-1135.
Tanabe S, Ashikari M, Fujioka S, Takatsuto S, Yoshida S, et al. 2005. A Novel Cytochrome P450 Is Implicated in Brassinosteroid Biosynthesis via the Characterization of a Rice Dwarf Mutant, dwarf11, with Reduced Seed Length. Plant Cell. 17:776-790.
Tong XH, Wang YF, Sun AQ, Kazeem B, Ni S, et al. 2018. Notched Belly Grain 4, a Novel Allele of Dwarf 11, Regulates Grain Shape and Seed Germination in Rice (Oryza sativa L.). International Journal of Molecular Sciences. 19:4069.

## Sheet: Field QTL
Population	Year	Environment	Trait	Formula	QTL Name	Chromosome	Most significantly associated marker	Marker position (cM)	LOD	R2	Parent with positive allele/increase in trait	Svevo Rel. 1.0	Zavitan v2.0	CS RefSeq v2.1	Known genes within this region 10 Mb1	Known genes within this region 50 Mb1	Known genes within this region 100 Mb1	Putative genes orthologs in Rice2	Present in GH	Flanking left	Marker position (cM)	LOD	Flanking right	Marker position (cM)	LOD
DP527	2017	Field	SPS	y ~ Q1 + Q2 + Q3 + Q4	QSpn.fcu-5A	5A	IWB30321	44.4688	3.80848	5.71197	PI 272527	39022678	42287622	38925103		TaSnRK2.9-5A	TaSnRK2.9-5A	OsPID, OsARF25	maybe	IWB68312	41.9169	1.70887	IWB11635	68.7418	1.67807
DP527	2017	Field	SPS		QSpn.fcu-5Ab	5A	IWB69752	150.387	5.76447	8.82999	PI 272527	558211269	603547251	598375860	Vrn1-A1	Vrn1-A1, TaNAC2-5A	Vrn1-A1, Q-5A, TaNAC2-5A			IWB71855	140.87	4.01865	IWB78813	156.766	3.74507
DP527	2017	Field	SPS		QSpn.fcu-5Ac	5A	Xfcp650(Q)	178.527	8.88229	14.0756	Divide	608794178	654782135	651815837	Q-5A	Q-5A	Q-5A			IWB71377	162.108	7.66425	IWB76666	182.556	7.41522
DP527	2017	Field	SPS		QSpn.fcu-7B	7B	IWB3164	10.5662	8.31154	13.0892	PI 272527	9380263	17076370	10546652	FT-1-7B	FT-1-7B	FT-1-7B, TaSus1-7B		yes	IWB70086	4.87176	6.64174	IWB11170	12.4902	7.40822
DP527	2017	Field	KPS	y ~ Q1 + Q2 + Q3	QKps.fcu-3A	3A	IWB38468	80.2318	5.23742	8.64618	Divide	506385315	514184334	515189516						IWB68071	71.1845	3.34024	IWB78859	94.7194	3.73096
DP527	2017	Field	KPS		QKps.fcu-4A	4A	IWB26513	50.2818	3.94827	6.42801	Divide	59770222	61033975	60342340				OsMADS1		IWB27620	19.6426	1.4062	IWB23723	107.253	1.20037
DP527	2017	Field	KPS		QKps.fcu-6A	6A	IWB7281	72.5582	4.47487	7.32678	Divide	529249256	545958924	537459870	TaGS1a	TaGS1a, GRF4-6A	TaGS1a, GRF4-6A, TaTPP-6A			IWB2480	56.5529	1.71297	IWB8212	81.0971	1.84141
DP527	2017	Field	GWS	y ~ Q1 + Q2 + Q3 + Q4	QGws.fcu-1A	1A	IWB45088	53.5835	4.161	6.4849	Divide	93805891	136388288	98085021				OsMPK16		IWB39517	19.9429	0.413672	IWB41993	163.679	0.548409
DP527	2017	Field	GWS		QGws.fcu-1B	1B	IWB16228	27.7709	3.83427	5.95471	PI 272527	44651652	62477935	55181302				OsGSN1		IWB10784	0	1.47953	IWB69585	55.08	1.45612
DP527	2017	Field	GWS		QGws.fcu-4A	4A	IWB80625	54.4024	8.38321	13.6774	Divide	101555990	104016922	103043725					yes, 2018	IWB46982	46.0849	6.0868	IWB80663	55.323	6.4858
DP527	2017	Field	GWS		QGws.fcu-7B	7B	IWB45102	3.23827	4.12636	6.42851	PI 272527	3883572	5287049	4175132	FT-1-7B	FT-1-7B	FT-1-7B, TaSus1-7B			IWB1438	0	2.59513	IWB11170	12.4902	2.73863
DP527	2017	Field	TKW	y ~ Q1 + Q2 + Q3 + Q4	QTkw.fcu-3A	3A	IWB74967	87.4732	7.33162	11.5501	PI 272527	517062873	525078124	525796307				OsGL2		IWB76401	77.0036	5.5089	IWB78859	94.7194	5.90187
DP527	2017	Field	TKW		QTkw.fcu-5A	5A	IWB62312	97.6152	4.8342	7.41229	PI 272527	475161408	516485538	512454950			Vrn1-A1	OsBU1		IWB62312	97.6152	4.8342	IWB62312	97.6152	4.8342
DP527	2017	Field	TKW		QTkw.fcu-5Ab	5A	IWB78461	97.8477	3.75272	5.68742	PI 272527	475479114	516840868	512797433			Vrn1-A1	OsBU1		IWB78461	97.8477	3.75272	IWB65391	225.561	0.0711326
DP527	2017	Field	TKW		QTkw.fcu-6A	6A	IWB30925	65.5995	4.72938	7.24338	PI 272527	492667721	508442321	497991504	GRF4-6A	TaGS1a, GRF4-6A, TaTPP-6A	TaGS1a, GRF4-6A, TaTPP-6A			IWB75276	29.2164	2.18265	IWB10739	73.2592	2.64113
DP527	2017	Field	DTH	y ~ Q1 + Q2 + Q3 + Q4 + Q5	QEet.fcu-4A	4A	IWB26513	50.2818	4.1844	4.59114	PI 272527	59770222	61033975	60342340				OsMADS1	yes, 2018	IWB46982	46.0849	1.33567	IWB59205	116.448	1.47423
DP527	2017	Field	DTH		QEet.fcu-5A	5A	IWB68312	41.9169	5.18735	5.7535	PI 272527	34333210	37548726	34565384		TaSnRK2.9-5A	TaSnRK2.9-5A	OsPID		IWB64310	30.1454	2.66942	IWB75389	53.1007	2.60456
DP527	2017	Field	DTH		QEet.fcu-5Ab	5A	Xfcp650(Q)	178.527	8.38359	9.62719	Divide	608794178	654782135	651815837	Q-5A	Q-5A	Q-5A		yes, 2018 and 2019	IWB71377	162.108	6.25317	IWB76666	182.556	7.30893
DP527	2017	Field	DTH		QEet.fcu-5B	5B	IWB72334	92.4898	5.84714	6.53176	PI 272527	514395841	529221573	519618633			Vrn1-B1		yes, 2018	IWB35472	89.6473	3.746	IWB54773	93.8863	4.38588
DP527	2017	Field	DTH		QEet.fcu-7B	7B	IWB3164	10.5662	27.6665	39.4941	PI 272527	9380263	17076370	10546652	FT-1-7B	FT-1-7B	FT-1-7B, TaSus1-7B		yes, 2018	IWB3164	10.5662	27.6665	IWB3164	10.5662	27.6665
DP527	2017	Field	PHT	y ~ Q1 + Q2 + Q3 + Q4 + Q5 + Q6 + Q7	QHt.fcu-1A	1A	IWB22052	49.3352	3.9852	3.07721	Divide	44162374	57305282	48799040						IWB78041	4.93335	0.843525	IWB7472	108.083	0.848994
DP527	2017	Field	PHT		QHt.fcu-2A	2A	IWB22123	79.7342	6.31639	5.00166	PI 272527	418432540	418206050	427903693		FUL2	SBEIIa, TaCwi-A1, FUL2			IWB53484	74.5496	3.81105	IWB23957	87.8006	3.88433
DP527	2017	Field	PHT		QHt.fcu-3A	3A	IWB65564	89.3418	23.4313	22.4621	PI 272527	524782328	532820246	533581557					yes	IWB2704	88.882	23.3513	IWB65564	89.3418	23.4313
DP527	2017	Field	PHT		QHt.fcu-3Ab	3A	IWB41859	144.388	6.1373	4.85042	PI 272527	674467758	683640777	683587492					yes	IWB45321	135.203	4.07406	IWB2973	146.275	5.24686
DP527	2017	Field	PHT		QHt.fcu-5Ab	5A	IWB66908	75.4514	7.36411	5.89808	PI 272527	426146185	410948951	464267593						IWB63769	75.221	5.70582	IWB50640	96.6729	5.50931
DP527	2017	Field	PHT		QHt.fcu-5A	5A	Xfcp650(Q)	178.527	11.2496	9.402	PI 272527	608794178	654782135	651815837	Q-5A	Q-5A	Q-5A		yes	IWB71377	162.108	9.47644	IWB65730	183.716	9.29094
DP527	2017	Field	PHT		QHt.fcu-7B	7B	IWB3164	10.5662	7.7324	6.21795	PI 272527	9380263	17076370	10546652	FT-1-7B	FT-1-7B	FT-1-7B, TaSus1-7B			IWB3164	10.5662	7.7324	IWB11170	12.4902	6.53682
DP527	2017	Field	KA	y ~ Q1 + Q2 + Q3 + Q4 + Q5 + Q6	QKa.fcu-2B	2B	IWB76653	45.5233	4.10431	4.79174	PI 272527	41084912	48709086	48048029		Ppd-B1	Ppd-B1		yes	IWB46375	41.2597	1.84038	IWB36295	159.317	1.27494
DP527	2017	Field	KA		QKa.fcu-3A	3A	IWB74967	87.4732	8.44046	10.3287	PI 272527	517062873	525078124	525796307				OsGL2		IWB76838	78.8471	6.4047	IWB78859	94.7194	6.52713
DP527	2017	Field	KA		QKa.fcu-3B	3B	IWB13416	61.8415	4.23678	4.95345	Divide	150781668	156939836	155823559		TaCKX2-3B	TaCKX2-3B, TaGS5-3B, Btr1-B	OsBZR1		IWB25735	54.2027	1.54269	IWB7782	73.7156	1.82437
DP527	2017	Field	KA		QKa.fcu-4A	4A	IWB24513	167.186	4.16424	4.86484	Divide	731839747	747633732	751825132	GS3-4A, 6-SFT-A2	GS3-4A, 6-SFT-A2	GS3-4A, TaTGW6-4A, 6-SFT-A2	OsNPR1		IWB46982	46.0849	1.2733	IWB33954	173.571	2.3248
DP527	2017	Field	KA		QKa.fcu-5A	5A	IWB62312	97.6152	4.89949	5.76933	PI 272527	475161408	516485538	512454950			Vrn1-A1	OsFH15		IWB63769	75.221	3.10719	IWB61032	103.387	2.32088
DP527	2017	Field	KA		QKa.fcu-6A	6A	IWB33567	65.8365	11.8798	15.0976	PI 272527	493823627	509599449	499138408	GRF4-6A	TaGS1a, GRF4-6A, TaTPP-6A	TaGS1a, GRF4-6A, TaTPP-6A		yes	IWB66345	63.9461	10.2981	IWB9318	69.6998	10.1333
DP527	2017	Field	KW	y ~ Q1 + Q2 + Q3 + Q4	QKw.fcu-2A	2A	IWB62849	83.8164	6.11434	8.51933	PI 272527	547989427	557917667	558542687		SBEIIa, TaCwi-A1	SBEIIa,TaCwi-A1, GNI1-A1-2A	OsD11		IWB9775	78.8082	4.17215	IWB70024	90.7307	3.91278
DP527	2017	Field	KW		QKw.fcu-3A	3A	IWB63094	8.201	4.11652	5.61322	PI 272527	1552802	12142291	12064745			TaTAR2.1-3A, Btr1-A			IWB44438	0	2.5483	IWB11348	141.455	0.808807
DP527	2017	Field	KW		QKw.fcu-3B	3B	IWB76128	60.6721	9.61905	13.9248	Divide	140358563	147102028	144703280		TaCKX2-3B, Btr1-B	TaCKX2-3B, TaGS5-3B, Btr1-B	OsBZR1		IWB47174	59.4962	7.25257	IWB65234	75.5773	7.13785
DP527	2017	Field	KW		QKw.fcu-6A	6A	IWB66345	63.9461	6.44463	9.01175	PI 272527	482019954	497369926	487455328		TaGS1a, GRF4-6A, TaTPP-6A	TaGS1a, GRF4-6A, TaTPP-6A			IWB34985	45.4324	4.42694	IWB8079	68.7473	4.9261
DP527	2017	Field	KL	y ~ Q1 + Q2 + Q3 + Q4 + Q5 + Q6	QKl.fcu-1A	1A	IWB34353	160.606	5.27407	5.3598	PI 272527	581313066	605188854	594439406	ELF3-a1	ELF3-a1	ELF3-a1			IWB36475	148.898	3.33107	IWB41993	163.679	3.50754
DP527	2017	Field	KL		QKl.fcu-1B	1B	IWB21571	24.9291	9.58223	10.2057	PI 272527	14325389	19675504	16966177				OsGSN1	yes	IWB10650	22.5334	7.35	IWB8875	37.7345	7.27925
DP527	2017	Field	KL		QKl.fcu-2A	2A	IWB72154	110.718	4.53732	4.57454	PI 272527	658462905	667431244	667284374		GNI1-A1-2A	GNI1-A1-2A, TaFlo2	OsMKKK10	yes	IWB35671	102.538	2.71277	IWB47525	124.276	2.8494
DP527	2017	Field	KL		QKl.fcu-2B	2B	IWB76653	45.5233	12.4237	13.6531	PI 272527	41084912	48709086	48048029		Ppd-B1	Ppd-B1		yes	IWB2317	43.657	10.3337	IWB8355	45.7558	11.0891
DP527	2017	Field	KL		QKl.fcu-3A	3A	IWB74967	87.4732	7.2742	7.55457	PI 272527	517062873	525078124	525796307				OsGL2	yes	IWB14495	79.3058	5.18875	IWB80393	95.8769	5.44552
DP527	2017	Field	KL		QKl.fcu-6A	6A	IWB6286	72.3289	11.4138	12.4039	PI 272527	527579950	544425142	535761739	TaGS1a	TaGS1a, GRF4-6A	TaGS1a, GRF4-6A, TaTPP-6A		yes	IWB9600	71.1494	9.01334	IWB78260	75.6327	9.1686
DP527	2017	Field	KC	y ~ Q1 + Q2 + Q3 + Q4 + Q5 + Q6	QKc.fcu-1B	1B	IWB16228	27.7709	8.22098	9.5017	PI 272527	44651652	62477935	55181302				OsGSN1	yes	IWB72705	23.0051	6.32226	IWB7813	31.9498	6.3996
DP527	2017	Field	KC		QKc.fcu-2A	2A	IWB62849	83.8164	9.43063	11.045	Divide	547989427	557917667	558542687		SBEIIa, TaCwi-A1	SBEIIa,TaCwi-A1, GNI1-A1-2A	OsD11	yes	IWB62849	83.8164	9.43063	IWB57539	84.0468	7.85411
DP527	2017	Field	KC		QKc.fcu-2Ab	2A	IWB72154	110.718	9.15295	10.6872	PI 272527	658462905	667431244	667284374		GNI1-A1-2A	GNI1-A1-2A, TaFlo2	OsMKKK10	yes	IWB35671	102.538	7.49008	IWB72154	110.718	9.15295
DP527	2017	Field	KC		QKc.fcu-2B	2B	IWB70916	45.2863	10.1076	11.9262	PI 272527	undetermined	47606437	46907474					yes	IWB2317	43.657	8.20022	IWB8355	45.7558	8.41309
DP527	2017	Field	KC		QKc.fcu-3A	3A	IWB38468	80.2318	3.72716	4.10307	PI 272527	506385315	514184334	515189516						IWB78757	59.5113	1.6274	IWB72074	108.41	1.67638
DP527	2017	Field	KC		QKc.fcu-6A	6A	IWB78960	75.174	4.00838	4.42603	PI 272527	538824385	555563608	546908706		TaGS1a, GRF4-6A	TaGS1a, GRF4-6A, TaTPP-6A			IWB8077	2.33347	1.26851	IWB71891	84.384	1.02753
DP527	2017	Field	KLW	y ~ Q1 + Q2 + Q3 + Q4 + Q5	QKlw.fcu-1B	1B	IWB60559	30.5522	7.80761	9.27069	PI 272527	56671601	96899953	67468759				OsGSN1	yes	IWB72705	23.0051	5.87432	IWB8875	37.7345	6.10017
DP527	2017	Field	KLW		QKlw.fcu-2A	2A	IWB62849	83.8164	11.4467	14.1453	Divide	547989427	557917667	558542687		SBEIIa, TaCwi-A1	SBEIIa,TaCwi-A1, GNI1-A1-2A	OsD11	yes	IWB62849	83.8164	11.4467	IWB57539	84.0468	10.8739
DP527	2017	Field	KLW		QKlw.fcu-2Ab	2A	IWB72154	110.718	8.31884	9.93298	PI 272527	658462905	667431244	667284374		GNI1-A1-2A	GNI1-A1-2A, TaFlo2	OsMKKK10	yes	IWB35671	102.538	7.36817	IWB47525	124.276	6.94065
DP527	2017	Field	KLW		QKlw.fcu-2B	2B	IWB76653	45.5233	9.56468	11.5774	PI 272527	41084912	48709086	48048029		Ppd-B1	Ppd-B1		yes	IWB2317	43.657	8.24384	IWB6117	53.1869	7.94412
DP527	2017	Field	KLW		QKlw.fcu-3B	3B	IWB1846	76.0382	4.52523	5.18535	PI 272527	510057178	524404568	518315028				OsGL2		IWB2481	60.4385	1.73469	IWB67684	116.24	1.71182
DP527	2019	Field	SPS	y ~ Q1 + Q2 + Q3 + Q4	QSpn.fcu-3A	3A	IWB73310	27.3796	4.60627	7.37432	PI 272527	20367672	23954593	24489088		TaTAR2.1-3A, Btr1-A	TaCKX2-3A, TaTAR2.1-3A, Btr1-A			IWB37079	22.5453	1.54811	IWB34362	95.6475	1.49502
DP527	2019	Field	SPS		QSpn.fcu-3B	3B	IWB7838	104.197	3.66377	5.80622	PI 272527	677945172	694238734	689307309						IWB2481	60.4385	0.699384	IWB10304	167.185	0.864395
DP527	2019	Field	SPS		QSpn.fcu-7B	7B	IWB3164	10.5662	5.19393	8.36804	PI 272527	9380263	17076370	10546652	FT-1-7B	FT-1-7B	FT-1-7B, TaSus1-7B		yes	IWB3164	10.5662	5.19393	IWB13248	16.0763	3.27573
DP527	2019	Field	SPS		QSpn.fcu-7Bb	7B	IWB9687	115.398	6.0784	9.88721	PI 272527	624272746	657434334	646678632		TaPLS20	TaSAP1-B1, TaSPL20			IWB57705	110.532	4.18025	IWB68305	121.314	4.30121
DP527	2019	Field	DTH	y ~ Q1 + Q2 + Q3 + Q2:Q3	QEet.fcu-4A	4A	IWB42362	113.4	3.52851	3.20462	PI 272527	615632386	724477502	621218149		TaCWI-4A	TaTGW6-4A, TaCWI-4A, TaSnRK2.10			IWB10389	5.02988	0.674481	IWB58808	136.116	0.766876
DP527	2019	Field	DTH		QEet.fcu-7B	7B	IWB1438	0	7.13275	6.74701	PI 272527	undetermined	undetermined	undetermined						IWB1438	0	7.13275	IWB45102	3.23827	6.16073
DP527	2019	Field	DTH		QEet.fcu-7Bb	7B	IWB3164	10.5662	21.3222	23.7946	PI 272527	9380263	17076370	10546652	FT-1-7B	FT-1-7B	FT-1-7B, TaSus1-7B		yes, 2018 and 2019	IWB3164	10.5662	21.3222	IWB3164	10.5662	21.3222
DP527	2019	Field	DTH			7B1:7B2			4.2352	3.87709
DP527	2019	Field	PHT	y ~ Q1 + Q2	QHt.fcu-3A	3A	IWB65564	89.3418	10.3013	18.3019	PI 272527	524782328	532820246	533581557				OsGL2	yes	IWB38468	80.2318	8.99517	IWB78859	94.7194	8.3083
DP527	2019	Field	PHT		QHt.fcu-5A	5A	Xfcp650(Q)	178.527	5.04356	8.4401	PI 272527	608794178	654782135	651815837	Q-5A	Q-5A	Q-5A		yes	IWB76977	148.516	3.40506	IWB54225	192.567	3.64405
DP527	2020	Field	SPS	y ~ Q1	QSpn.fcu-7B	7B	IWB3164	10.5662	4.61804	9.33547	PI 272527	9380263	17076370	10546652	FT-1-7B	FT-1-7B	FT-1-7B, TaSus1-7B		yes	IWB72316	4.4088	1.79473	IWB13248	16.0763	1.99686
DP527	2020	Field	KPS	y ~ Q1	QKps.fcu-2B	2B	IWB9690	74.5032	3.50584	7.17006	Divide	132989063	151929400	141590671	TaTGW-2B	TaTGW-2B, TaSus2-2B, TaGW7-2B, ful3	TaTGW-2B, TaSus2-2B, TaGW7-2B, Ppd-B1, ful3			IWB81306	40.0924	0.91044	IWB65990	92.7469	0.861551
DP527	2020	Field	TKWrep1	y ~ Q1 + Q2	QTkw.fcu-3A	3A	IWB49380	78.1569	7.3266	13.4861	PI 272527	484051029	491875173	492982203				OsMAPK6		IWB68071	71.1845	5.59225	IWB76466	82.9042	5.00508
DP527	2020	Field	TKWrep1		QTkw.fcu-7B	7B	IWB11170	12.4902	6.29488	11.448	Divide	11055823	18761278	12831094	FT-1-7B	FT-1-7B	FT-1-7B, TaSus1-7B		yes	IWB54221	4.64028	4.6287	IWB13248	16.0763	4.47828
DP527	2020	Field	TKWrep2	y ~ Q1 + Q2 + Q3	QTkw.fcu-3A	3A	IWB74967	87.4732	4.34954	7.50972	PI 272527	517062873	525078124	525796307				OsGL2		IWB67595	70.4868	1.83817	IWB80393	95.8769	1.50351
DP527	2020	Field	TKWrep2		QTkw.fcu-6B	6B	IWB78600	73.3608	3.82397	6.56469	PI 272527	496047408	518131237	527309392						IWB10656	57.7622	1.35555	IWB78052	85.568	1.49959
DP527	2020	Field	TKWrep2		QTkw.fcu-7B	7B	IWB70086	4.87176	4.38921	7.58148	Divide	6166041	8069421	6732712					yes	IWB1438	0	3.53839	IWB13248	16.0763	3.1153
DP527	2020	Field	TKWrep3	y ~ Q1	QTkw.fcu-6A	6A	IWB9600	71.1494	3.5191	7.74623	PI 272527	523155440	539550272	528582658						IWB21510	22.1068	0.755987	IWB113	121.134	0.749249
DP527	2020	Field	DTH	y ~ Q1 + Q2 + Q1:Q2	QEet.fcu-5A	5A	IWB78540	144.277	14.0616	15.7135	Divide	548463375	595504358	588575253	Vrn1-A1	Vrn1-A1, TaNAC2-5A	Vrn1-A1, Q-5A, TaNAC2-5A			IWB77517	139.179	12.6868	IWB76977	148.516	13.5502
DP527	2020	Field	DTH		QEet.fcu-7B	7B	IWB3164	10.5662	34.9264	49.6397	PI 272527	9380263	17076370	10546652	FT-1-7B	FT-1-7B	FT-1-7B, TaSus1-7B		yes, 2018 and 2019	IWB3164	10.5662	34.9264	IWB3164	10.5662	34.9264
DP527	2020	Field	DTH			5A:7B			6.74325	6.95252
DP527	2020	Field	PHT	y ~ Q1 + Q2 + Q3 + Q4 + Q5 + Q6 + Q7	QHt.fcu-1A	1A	IWB43491	76.8922	3.86552	3.53576	Divide	471745395	493539581	481434285			TaSnRK2.3			IWB60351	5.16166	0.672737	IWB80253	93.0166	0.682494
DP527	2020	Field	PHT		QHt.fcu-2B	2B	IWB8355	45.7558	4.83157	4.46564	Divide	42118584	50615757	49658167		Ppd-B1	Ppd-B1			IWB2317	43.657	4.1082	IWB54881	56.491	3.47297
DP527	2020	Field	PHT		QHt.fcu-3A	3A	IWB2704	88.882	23.048	26.0919	PI 272527	524569714	532610830	533369893					yes	IWB74967	87.4732	21.567	IWB65564	89.3418	22.9316
DP527	2020	Field	PHT		QHt.fcu-3Ab	3A	IWB64845	141.224	3.70603	3.38406	PI 272527	660916473	669590758	669691734			TaTGW6-A1		yes	IWB72074	108.41	0.628829	IWB71198	164.128	0.692401
DP527	2020	Field	PHT		QHt.fcu-5Ab	5A	IWB6959	81.0059	4.75791	4.39406	PI 272527	439280653	424223235	476889796					yes	IWB17401	36.685	2.21514	IWB60157	99.2487	2.01089
DP527	2020	Field	PHT		QHt.fcu-5A	5A	Xfcp650(Q)	178.527	10.8217	10.6772	PI 272527	608794178	654782135	651815837	Q-5A	Q-5A	Q-5A		yes	IWB71377	162.108	9.14901	IWB76666	182.556	9.28846
DP527	2020	Field	PHT		QHt.fcu-7B	7B	IWB3164	10.5662	3.6794	3.35879	PI 272527	9380263	17076370	10546652	FT-1-7B	FT-1-7B	FT-1-7B, TaSus1-7B			IWB1438	0	0.916676	IWB64301	168.289	0.271002
DP527	2020	Field	KA	y ~ Q1 + Q2 + Q3 + Q4 + Q5	QKa.fcu-3A	3A	IWB2704	88.882	7.2446	9.90654	PI 272527	524569714	532610830	533369893				OsGL2		IWB2241	72.5933	4.9234	IWB78859	94.7194	6.14837
DP527	2020	Field	KA		QKa.fcu-3B	3B	IWB76128	60.6721	4.58083	6.08416	Divide	140358563	147102028	144703280		TaCKX2-3B, Btr1-B	TaCKX2-3B, TaGS5-3B, Btr1-B	OsBZR1		IWB56601	56.7842	2.66704	IWB8396	74.1808	2.53819
DP527	2020	Field	KA		QKa.fcu-4A	4A	IWB78954	61.8121	3.80615	5.01286	Divide	514103053	529237872	530723929		TaSnRK2.10	Rht-a1, TB1-4A, TaSnRK2.10, TaCWI-4A		yes	IWB10389	5.02988	0.59843	IWB61019	172.642	0.673944
DP527	2020	Field	KA		QKa.fcu-6A	6A	IWB81565	66.5508	7.50891	10.2978	PI 272527	495470088	511290715	500833528	GRF4-6A	GRF4-6A, TaTPP-6A, TaGS1a	GRF4-6A, TaTPP-6A, TaGS1a		yes	IWB71835	61.8002	5.15347	IWB78260	75.6327	5.41619
DP527	2020	Field	KA		QKa.fcu-7B	7B	IWB11170	12.4902	6.16772	8.33495	Divide	11055823	18761278	12831094	FT-1-7B	FT-1-7B	FT-1-7B, TaSus1-7B			IWB3164	10.5662	4.28935	IWB9255	28.4805	4.43241
DP527	2020	Field	KW	y ~ Q1 + Q2 + Q3 + Q4 + Q5 + Q6 + Q7	QKw.fcu-1B	1B	IWB9236	27.0732	5.26073	6.01227	Divide	41980802	58358169	52409952				OsGSN1		IWB9441	21.8422	3.24166	IWB8875	37.7345	3.38442
DP527	2020	Field	KW		QKw.fcu-2A	2A	IWB62849	83.8164	3.81388	4.29064	PI 272527	547989427	557917667	558542687				OsD11		IWB72864	47.6692	0.32523	IWB72749	187.258	0.272292
DP527	2020	Field	KW		QKw.fcu-3A	3A	IWB46311	8.89438	3.66271	4.11381	PI 272527	1850050	12592123	12504181			TaTAR2.1-3A, Btr1-A			IWB44438	0	1.55512	IWB69392	118.423	0.540812
DP527	2020	Field	KW		QKw.fcu-3B	3B	IWB76128	60.6721	11.8591	14.5771	Divide	140358563	147102028	144703280		TaCKX2-3B, Btr1-B	TaCKX2-3B, TaGS5-3B, Btr1-B			IWB79735	59.7309	10.0513	IWB79746	62.0763	9.53368
DP527	2020	Field	KW		QKw.fcu-5A	5A	Xfcp650(Q)	178.527	3.88491	4.37391	Divide	608794178	654782135	651815837	Q-5A	Q-5A	Q-5A			IWB41384	18.2507	0.730379	IWB77408	207.709	1.11936
DP527	2020	Field	KW		QKw.fcu-6A	6A	IWB66345	63.9461	5.68102	6.52247	PI 272527	482019954	497369926	487455328		GRF4-6A, TaTPP-6A, TaGS1a	GRF4-6A, TaTPP-6A, TaGS1a			IWB34985	45.4324	3.38024	IWB9600	71.1494	3.5304
DP527	2020	Field	KW		QKw.fcu-7B	7B	IWB40019	13.9398	3.77987	4.2508	Divide	719150020	21495583	16211144			TaSPL20	OsBRD2		IWB1438	0	0.892723	IWB71832	120.606	0.878623
DP527	2020	Field	KL	y ~ Q1 + Q2 + Q3 + Q4 + Q5 + Q6	QKl.fcu-1B	1B	IWB72705	23.0051	6.03245	7.71611	PI 272527	33642750	49276551	43283912				OsGSN1	yes	IWB12475	19.1827	3.74885	IWB7813	31.9498	3.80569
DP527	2020	Field	KL		QKl.fcu-2A	2A	IWB62849	83.8164	7.49031	9.73529	Divide	547989427	557917667	558542687		SBEIIa, TaCwi-A1	SBEIIa,TaCwi-A1, GNI1-A1-2A	OsD11	yes	IWB22123	79.7342	5.92703	IWB57539	84.0468	6.32393
DP527	2020	Field	KL		QKl.fcu-2Ab	2A	IWB35671	102.538	4.57542	5.76011	PI 272527	15905157	19302753	19140320		Ppd-A1	Ppd-A1, TaTGW-2A	OsARG	yes	IWB23957	87.8006	2.93418	IWB81574	124.971	2.58159
DP527	2020	Field	KL		QKl.fcu-2B	2B	IWB77048	44.8255	7.38652	9.58944	PI 272527	38605061	46204802	45583491		Ppd-B1	Ppd-B1		yes	IWB46375	41.2597	5.86317	IWB6117	53.1869	6.07857
DP527	2020	Field	KL		QKl.fcu-3A	3A	IWB38468	80.2318	6.70225	8.63597	PI 272527	506385315	514184334	515189516					yes	IWB67595	70.4868	5.11796	IWB78859	94.7194	4.99944
DP527	2020	Field	KL		QKl.fcu-6A	6A	IWB78960	75.174	5.61484	7.14923	PI 272527	538824385	555563608	546908706		TaGS1a, GRF4-6A	TaGS1a, GRF4-6A, TaTPP-6A		yes	IWB9600	71.1494	3.68858	IWB42214	82.2655	3.41927
DP527	2020	Field	KC	y ~ Q1 + Q2 + Q3	QKc.fcu-1B	1B	IWB21571	24.9291	10.1702	16.9317	PI 272527	14325389	19675504	16966177				OsGSN1	yes	IWB72705	23.0051	8.74255	IWB60559	30.5522	8.38777
DP527	2020	Field	KC		QKc.fcu-2B	2B	IWB70916	45.2863	5.02398	7.90379	PI 272527	undetermined	47606437	46907474					yes	IWB65469	41.4923	3.1499	IWB78658	62.5021	3.38737
DP527	2020	Field	KC		QKc.fcu-4B	4B	IWB79731	81.5994	3.71555	5.76275	Divide	546668684	undetermined	541893324				OsMCA1		IWB6722	6.2826	0.650706	IWB4426	102.903	0.576116
DP527	2020	Field	KLW	y ~ Q1 + Q2 + Q3 + Q4 + Q5	QKlw.fcu-1B	1B	IWB21571	24.9291	10.3592	13.4771	PI 272527	14325389	19675504	16966177				OsGSN1	yes	IWB70479	22.7682	8.29914	IWB7813	31.9498	8.59877
DP527	2020	Field	KLW		QKlw.fcu-2A	2A	IWB62849	83.8164	7.23511	9.09346	Divide	547989427	557917667	558542687		SBEIIa, TaCwi-A1	SBEIIa,TaCwi-A1, GNI1-A1-2A	OsD11	yes	IWB62849	83.8164	7.23511	IWB57539	84.0468	6.22652
DP527	2020	Field	KLW		QKlw.fcu-2B	2B	IWB77048	44.8255	7.88418	9.98025	PI 272527	38605061	46204802	45583491		Ppd-B1	Ppd-B1		yes	IWB2317	43.657	7.21778	IWB6117	53.1869	5.94364
DP527	2020	Field	KLW		QKlw.fcu-3A	3A	IWB10546	12.0179	4.14001	5.03035	Divide	2660176	13396967	13205369			TaTAR2.1-3A, Btr1-A			IWB12581	5.29926	1.9305	IWB45745	104.922	1.70107
DP527	2020	Field	KLW		QKlw.fcu-5A	5A	Xfcp650(Q)	178.527	4.59539	5.61138	PI 272527	608794178	654782135	651815837	Q-5A	Q-5A	Q-5A			IWB71377	162.108	2.38881	IWB50429	201.249	2.39415
References for putative wheat genes underlying QTL1
Alvarez MA, Tranquilli G, Lewis S, Kippes N, Dubcovsky J. 2016. Genetic and physical mapping of the erliness per se locus Eps-Am 1 in Triticum monococcum identifies EARLY FLOWERING 3 (ELF3) as a candidate gene. Funct Integr Genomics. 16:365-82.
Avni R, Nave M, Barad O, Baruch K, Twardziok SO, et al. 2017. Wild emmer genome architecture and diversity elucidate wheat evolution and domestication. 357:93-97.
Avni R, Oren L, Shabtay G, Assili S, Pozniak C, et al. 2018. Genome based meta-QTL analysis of grain weight in tatraploid wheat identifies rare alleles of GRF4 associated with larger grains. Genes. 9:636.
Boden SA, Cavanagh C, Cullis BR, Ramm K, Greenwood J, et al. 2015. Ppd-1 is a key regulator of inflorescence architecture and paired spikelet development in wheat. Nat Plants. 1:14016.
Chang J, Zhang J, Mao X, Li A, Jia J, et al. 2013. Polymorphism of TaSAP1-A1 and its association with agronomic traits in wheat. Planta. 237:1495-1508.
Distelfeld A, Tranquilli G, Li C, Yan L, Dubcovsky J. 2009. Genetic and molecular characterization of the VRN2 loci in tetraploid wheat. Plant Physiol. 149:245-257.
Dixon LE, Greenwood JR, Bencivenga S, Zhang P, Cockram J, et al. (2018) TEOSINTE BRANCHED1 regulates inflorescence architecture and development in bread wheat (Triticum aestivum L.). Plant Cell. DOI:10.1105/tpc.17.00961.
Gao X, She MY, Yin GX, Yu Y, Du LP, et al. 2010. Cloning and characterization of genes coding for fructan biosynthesis enzymes (FBEs) in triticeae plants. Agricultural Sciences in China. 9:313-324.
Golan G, Ayalon I, Perry A, Zimran G, Ade-Ajayi T, et al. 2019. GNI-A1 mediated trade-offs between grain number and grain weight in tetraploid wheat. Theor Appl Genet. 132:2353-2365.
Guo Y, Sun J, Zhang G, Wang Y, Kong F, et al. 2013. Haplotype, molecular marker and phenotype effects associated with mineral nutrient and grain size traits of TaGS1a in wheat. Field Crop Res. 154:119-125.
Hanif M, Gao F, Liu J, Wen W, Zhang Y, et al. 2016. TaTGW6-A1, an ortholog of rice TGW6, is associated with grain weight and yield in bread wheat. Mol Breeding. 36:1.
Hazard B, Zhang X, Colasuonno P, Uauy C, Beckles DM, et al. Induced mutations in the starch branching enzyme II (SBEII) genes increase amylose and resistance starch content in durum wheat. Crop Sci. 52:1754-1766.
He X, Qu B, Li W, Zhao X, Teng W, et al. 2015. The nitrate-inducible NAC transcription factor TaNAC2-5A controls nitrate response and increases wheat yield. Plant Physiol. 169:1991-2005.
Hou J, Jiang Q, Hao C, Wang Y, Zhang H, et al. 2014. Global selection on sucrose synthase haplotypes during a century of wheat breeding. Plant Physiol. 164:1918-1929.
Hu MJ, Zhang HP, Liu K, Cao JJ, Wang SX, et al. 2016. Cloning and characterization of TaTGW-7A gene associated with grain weight in wheat via SLAF-seq-BSA. Front Plant Sci. https://doi.org/10.3389/fpls.2016.01902.
Jiang Q, Hou J, Hao C, Wang L, Ge H, et al. 2011. The wheat (T. aestivum) sucrose synthase 2 gene (TaSus2) active in endosperm development is associated with yield traits. Funct Integr Genomic. 11:49-61.
Jiang Y, Jiang Q, Hao C, Hou J, Wang L, et al. 2015. A yield-associated gene TaCWI, in wheat: its function, selection and evolution in global breeding revealed by haplotype analysis. Theor Appl Genet. 128:131-143.
Li C, Lin H, Chen A, Lau M, Jernstedt J, et al. 2019. Wheat VRN1, FUL2 and FUL3 play critical and redundant roles in spikelet development and spike determinacy. Development. 146:dev175398.
Ma D, Jan J, He Z, Wu L, Xia X. 2012. Characterization of a cell wall invertase gene TaCwi-A1 on common wheat chromosome 2A and development of functional markers. Mol Breeding. 29:43-52.
Ma L, Li T, Hao C, Wang Y, Chen X, et al. 2016. TaGS5-3A, a grain size gene selected during wheat improvement for larger kernel and yield. Plant Biotechnol. 14:1269-1280.
Miao L, Mao X, Wang J, Liu Z, Zhang B, et al. 2017. Elite haplotypes of a protein kinase gene TaSnRK2.3 associated with important agronomic traits in common wheat. Front Plant Sci. https://doi.org/10.3389/fpls.2017.00368.
Pearce S, Saville R, Vaughan SP, Chandler PM, Wilhelm EP, et al. 2011. Molecular characterization of Rht-1 dwarfing genes in hexaploid wheat. Plant Physiol. 157:1820-1831.
Rehman SU, Wang J, Chang X, Zhang X, Mao X, et al. 2019. A wheat protein kinase gene TaSnRK2.9-5A associated with yield contributing traits. Theor Appl Genet. 132:907-919.
Sajjad M, MaX, Khan SH, Shoaib M, Song Y, et al. 2017. TaFlo2-A1, an ortholog of rice Flo2, is associated with thousand grain weight in bread wheat (Triticum aestivum L.). BMC Plant Biol. 17:164.
Shao A, Ma W, Zhao X, Hu M, He X, et al. 2017. The auxin biosynthetic TRYPTOPHAN AMINOTRANSFERASE RELATED TaTAR2.1-3A increases grain yield of wheat. Plant Physiol. 174:2274-2288.
Simons KJ, Fellers JP, Trick HN, Zhang Z, Tai YS, et al. 2006. Molecular characterization of the major wheat domestication gene Q. Genetics. 172:547-555.
Wang W, Pan Q, Tain B, He F, Chen Y, et al. 2019. Gene editing of the wheat homologs of TONNEAU1-recruiting motif encoding gene affects grain shape and weight in wheat. Plant J. 100:251-264.
Yan L, Fu D, Li C, Blechl A, Tranquilli G, et al. 2006. The wheat and barley vernalization gene VRN3 is an orthologue of FT. Proc Natl Acad Sci. 103:19581-19586.
Yan L, Helguera M, Kato K, Fukuyama S, Sherman J, et al. 2004. Allelic variation at the VRN-1 promoter region in polyploid wheat. Theor Appl Genet. 109:1677-1686.
Yan L, Loukoianov A, Blechl A, Tranquilli G, Ramakrishna W, et al. 2004. The wheat VRN2 gene is a flowering repressor downregulated by vernalization. Science. 303:1640-1644.
Yan L, Loukoianov A, Tranquilli G, Helguera M, Fahima T, et al. 2003. Positional cloning of the wheat vernalization gene VRN1. Proc Natl Acad Sci. 100:6263-6268.
Yang J, Zhou Y, Zhang Y, Hu W, Wu Q, et al. 2019. Cloning, characterization of TaGS3 and identification of allelic variation associated with kernel traits in whear (Triticum aestivum L.). BMC Genetics. 20:98.
Zhang B, Xu W, Liu X, Mao X, Li A, et al. 2017. Functional conservation and divergence among homoeologs of TaSPL20 and TaSPL21, two SBP-box genes governing yield-related traits in hexaploid wheat. Plant Physiol. 174:1177-1191.
Zhang L, Zhao YL, Gao LF, Zhao GY, Zhou RH, et al. 2012. TaCK6-D1, the ortholog of rice OsCKX2, is association with grain weight in hexaploid wheat. New Phytol. 195:574-584.
Zhang P, He Z, Tian X, Gao F, Xu D, et al. 2017. Cloning of TaTPP-6AL1 associated with grain weight in bread wheat and development of functional marker. Mol Breeding. 37:78.
Zhang ZG, Lv G, Li B, Wang JJ, Zhao Y, et al. 2017. Isolation and characterization of the TaSnRK2.10 gene and its association with agronomic traits in wheat (Triticum aestivum L.). PloS one. https://doi.org/10.1371/journal.pone.0174425.
References for putative gene orthologs in Rice2
Guo T, Chen K, Dong NQ, Shi CL, Ye WW, et al. 2018. GRAIN SIZE AND NUMBER1 Negatively Regulates the OsMKKK10-OsMKK4-OsMPK6 Cascade to Coordinate the Trade-off between Grain Number per Panicle and Grain Size in Rice. The Plant Cell. 30:871-890.
He YB, Yan L, Ge CN, Yao XF, Han X, et al. 2019. PINOID is required for formation of the stigma and style in rice. Plant Physiol. 180:926-936.
Heang D, Sassa H. 2012. Antagonistic Actions of HLH/bHLH Proteins Are Involved in Grain Length and Weight in Rice. PLoS ONE. 7: e31325.
Hong YB, Liu QN, Cao YR, Zhang Y, Chen DB, et al. 2019. The OsMPK15 Negatively Regulates Magnaporthe oryza and Xoo Disease Resistance via SA and JA Signaling Pathway in Rice. Front Plant Sci. 10:752.
Li XZ, Yang DL, Sun L, Mao BZ, He ZH. 2016. The systemic acquired resistance regulator OsNPR1 attenuates growth by repressing auxin signaling through promoting IAA-Amido synthase expression. Plant Physiol. 172:546-558.
Liu Q, Han RX, Wu K, Zhang JQ, Ye YF, et al. 2018. G-protein βγ subunits determine grain size through interaction with MADS-domain transcription factors in rice. Nature Communications. 9:852.
Liu ZW, Chen Q, Sun YF, Dai HX, Song GY, et al. 2015. A SNP in OsMCA1 responding for a plant architecture defect by deactivation of bioactive GA in rice. Plant Mol Biol. 87:17-30.
Ma XF, Cheng ZJ, Qin RZ, Qiu Y, Heng YQ, et al. 2013. OsARG encodes an arginase that plays critical roles in panicle development and grain production in rice. Plant J. 73:190-200.
Qi P, Lin YS, Song XJ, Shen JB, Huang W, et al. 2012. The novel quantitative trait locus GL3.1 controls rice grain size and yield by regulating Cyclin-T1;3. Cell Research. 22:1666-1680.
Qin R, Zeng DD, Yang CC, Akhter D, Jin XL, et al. 2018. LTBSG1, a New Allele of BRD2, Regulates Panicle and Grain Development in Rice by Brassinosteroid Biosynthetic Pathway, Genes. 96:292.
Ruan WY, Guo MN, Xu L, Wang XQ, Zhao HY, et al. 2018. An SPX-RLI1 Module Regulates Leaf Inclination in Response to Phosphate Availability in Rice. Plant Cell. 30:853-870.
Sun T, Li SW, Ren HY. 2017. OsFH15, a class I formin, interacts with microfilaments and microtubules to regulate grain size via affecting cell expansion in rice. Sci Rep. 7:6538.
Tanabe S, Ashikari M, Fujioka S, Takatsuto S, Yoshida S, et al. 2005. A Novel Cytochrome P450 Is Implicated in Brassinosteroid Biosynthesis via the Characterization of a Rice Dwarf Mutant, dwarf11, with Reduced Seed Length. Plant Cell. 17:776-790.
Zhu XL, Liang WQ, Cui X, Chen MJ, Yin CS, et al. 2015. The RLA1/SMOS1 Transcription Factor Functions with OsBZR1 to Regulate Brassinosteroid Signaling and Rice Architecture. Plant Cell. 29:292-309.
